# Supplementary material for: Involution of Breast Lobules, Mammographic Breast Density and Prognosis Among Tamoxifen-Treated Estrogen Receptor-Positive Breast Cancer Patients
Source: MDPI journal article supplement (doi:10.3390/jcm8111868), 2019-11-04
Supplement: s1 [file s1]

**Supplementary Table 1A.** Selected patient and tumor characteristics among ER-positive breast cancer patients with benign tissue available for analysis compared to ER-positive breast cancer patients with no tissue available for analysis in this study (sensitivity analysis).

| Characteristic                  | <b>Total<br/>(N = 349)</b> |          | <b>Patients with tissue available</b> |          |                     |          | <b>P value <sup>s</sup></b> |
|---------------------------------|----------------------------|----------|---------------------------------------|----------|---------------------|----------|-----------------------------|
|                                 | <b>N</b>                   | <b>%</b> | <b>Yes (N = 234)</b>                  | <b>%</b> | <b>No (N = 115)</b> | <b>%</b> |                             |
| Age at diagnosis (years)        |                            |          |                                       |          |                     |          | 0.33                        |
| <50                             | 88                         | 25.2     | 59                                    | 25.2     | 29                  | 25.2     |                             |
| 50–59                           | 89                         | 25.5     | 65                                    | 27.8     | 24                  | 20.9     |                             |
| >59                             | 172                        | 49.3     | 110                                   | 47.0     | 62                  | 53.9     |                             |
| Race                            |                            |          |                                       |          |                     |          | 0.45 *                      |
| White                           | 340                        | 97.4     | 229                                   | 97.9     | 111                 | 96.5     |                             |
| Non-white                       | 8                          | 2.3      | 4                                     | 1.7      | 4                   | 3.5      |                             |
| Missing                         | 1                          | 0.3      | 1                                     | 0.4      | 0                   | 0.0      |                             |
| Smoking status at baseline      |                            |          |                                       |          |                     |          | 0.18                        |
| Never                           | 199                        | 57.0     | 128                                   | 54.7     | 71                  | 61.7     |                             |
| Ever                            | 149                        | 42.7     | 106                                   | 45.3     | 43                  | 37.4     |                             |
| Missing                         | 1                          | 0.3      | 0                                     | 0.0      | 1                   | 0.9      |                             |
| BMI at diagnosis (kg/m2)        |                            |          |                                       |          |                     |          | 0.13                        |
| <25                             | 98                         | 28.1     | 72                                    | 30.8     | 26                  | 22.6     |                             |
| 25 to <30                       | 105                        | 30.1     | 64                                    | 27.4     | 41                  | 35.7     |                             |
| >=30                            | 107                        | 30.7     | 67                                    | 28.6     | 40                  | 34.8     |                             |
| Missing                         | 39                         | 11.2     | 31                                    | 13.2     | 8                   | 7.0      |                             |
| Hormone therapy use at baseline |                            |          |                                       |          |                     |          | 0.10                        |
| Non-user                        | 151                        | 43.3     | 92                                    | 39.3     | 59                  | 51.3     |                             |
| Current user                    | 144                        | 41.3     | 104                                   | 44.4     | 40                  | 34.8     |                             |
| Former user                     | 54                         | 15.5     | 38                                    | 16.2     | 16                  | 13.9     |                             |
| SEER summary stage at diagnosis |                            |          |                                       |          |                     |          | 0.29                        |
| Localized                       | 153                        | 43.8     | 98                                    | 41.9     | 55                  | 47.8     |                             |
| Regional/distant/unknown        | 196                        | 56.2     | 136                                   | 58.1     | 60                  | 52.2     |                             |
| Year of Diagnosis               |                            |          |                                       |          |                     |          | 0.89                        |
| 1990-1996                       | 141                        | 40.4     | 93                                    | 39.7     | 48                  | 41.7     |                             |
| 1997-2000                       | 115                        | 33.0     | 79                                    | 33.8     | 36                  | 31.3     |                             |
| 2001-2008                       | 93                         | 26.6     | 62                                    | 26.5     | 31                  | 27.0     |                             |
| Progesterone Receptor           |                            |          |                                       |          |                     |          | 0.63                        |
| Negative                        | 69                         | 19.8     | 48                                    | 20.5     | 21                  | 18.3     |                             |
| Positive                        | 278                        | 79.7     | 185                                   | 79.1     | 93                  | 80.9     |                             |
| Missing                         | 2                          | 0.6      | 1                                     | 0.4      | 1                   | 0.9      |                             |
| Tumor Size (mm)                 |                            |          |                                       |          |                     |          | 0.73                        |
| ≤ 2                             | 209                        | 59.9     | 141                                   | 60.3     | 68                  | 59.1     |                             |
| > 2                             | 128                        | 36.7     | 84                                    | 35.9     | 44                  | 38.3     |                             |
| Missing                         | 12                         | 3.4      | 9                                     | 3.8      | 3                   | 2.6      |                             |
| Tumor differentiation           |                            |          |                                       |          |                     |          | 0.47                        |
| Well differentiated             | 68                         | 19.5     | 44                                    | 18.8     | 24                  | 20.9     |                             |
| Moderately differentiated       | 176                        | 50.4     | 123                                   | 52.6     | 53                  | 46.1     |                             |
| Poorly differentiated           | 86                         | 24.6     | 54                                    | 23.1     | 32                  | 27.8     |                             |

|                                   |            |      |            |      |            |      |                   |
|-----------------------------------|------------|------|------------|------|------------|------|-------------------|
| Missing                           | 19         | 5.4  | 13         | 5.6  | 6          | 5.2  |                   |
| Duration of tamoxifen use, months |            |      |            |      |            |      | 0.73 <sup>#</sup> |
| Mean (Std Error)                  | 49.6 (1.1) |      | 50.4 (1.3) |      | 47.9 (1.8) |      |                   |
| Breast Cancer Death               |            |      |            |      |            |      | <b>&lt;0.01</b>   |
| No                                | 252        | 72.2 | 180        | 76.9 | 72         | 62.6 |                   |
| Yes                               | 97         | 27.8 | 54         | 23.1 | 43         | 37.4 |                   |

\$ Chi-Squared analysis; \* Fisher exact test; *P* values were computed excluding missing categories; # Wilcoxon rank sum test; *P*-values <0.05 are highlighted in bold font.

**Supplementary Table 1B.** Comparison of selected patient and tumor characteristics among ER-positive breast cancer case or control patients with tissue and available for analysis in this study versus ER-positive breast cancer case and control patients with no tissue available for analysis (sensitivity analysis).

| Variable                        | Case patients |                       |              |    |             | Comparison of case patients with versus without tissue | Control patients |                          |               |    |             | Comparison of control patients with versus without tissue | P values             | P values |
|---------------------------------|---------------|-----------------------|--------------|----|-------------|--------------------------------------------------------|------------------|--------------------------|---------------|----|-------------|-----------------------------------------------------------|----------------------|----------|
|                                 | Total         | Case tissue available |              |    |             |                                                        | Total            | Control tissue available |               |    |             |                                                           |                      |          |
|                                 |               | (N = 97)              | Yes (N = 54) |    | No (N = 43) |                                                        |                  | (N = 252)                | Yes (N = 180) |    | No (N = 72) |                                                           |                      |          |
|                                 | N             | N                     | %            | N  | %           | P value <sup>s</sup>                                   | N                | N                        | %             | N  | %           | P value <sup>s</sup>                                      | P value <sup>s</sup> |          |
| Age at diagnosis (years)        |               |                       |              |    |             | 0.75                                                   |                  |                          |               |    |             | 0.19                                                      | 0.37                 |          |
| <50                             | 28            | 14                    | 25.9         | 14 | 32.6        |                                                        | 60               | 45                       | 25.0          | 15 | 20.8        |                                                           |                      |          |
| 50-59                           | 18            | 10                    | 18.5         | 8  | 18.6        |                                                        | 71               | 55                       | 30.6          | 16 | 22.2        |                                                           |                      |          |
| >59                             | 51            | 30                    | 55.6         | 21 | 48.8        |                                                        | 121              | 80                       | 44.4          | 41 | 56.9        |                                                           |                      |          |
| Race                            |               |                       |              |    |             | 0.44*                                                  |                  |                          |               |    |             | 0.41*                                                     | 1.00                 |          |
| White                           | 96            | 54                    | 100.0        | 42 | 97.7        |                                                        | 244              | 175                      | 97.2          | 69 | 95.8        |                                                           |                      |          |
| Non-white                       | 1             | 0                     | 0.0          | 1  | 2.3         |                                                        | 7                | 4                        | 2.2           | 3  | 4.2         |                                                           |                      |          |
| Missing                         | 0             | 0                     | 0.0          | 0  | 0.0         |                                                        | 1                | 1                        | 0.6           | 0  | 0.0         |                                                           |                      |          |
| Smoking status at baseline      |               |                       |              |    |             | 0.31                                                   |                  |                          |               |    |             | 0.14                                                      | 0.06                 |          |
| Never                           | 44            | 22                    | 40.7         | 22 | 51.2        |                                                        | 155              | 106                      | 58.9          | 49 | 68.1        |                                                           |                      |          |
| Ever                            | 53            | 32                    | 59.3         | 21 | 48.8        |                                                        | 96               | 74                       | 41.1          | 22 | 30.6        |                                                           |                      |          |
| Missing                         | 0             | 0                     | 0.0          | 0  | 0.0         |                                                        | 1                | 0                        | 0.0           | 1  | 1.4         |                                                           |                      |          |
| BMI at diagnosis (kg/m2)        |               |                       |              |    |             | 0.86                                                   |                  |                          |               |    |             | 0.04                                                      | 0.67                 |          |
| <25                             | 22            | 11                    | 20.4         | 11 | 25.6        |                                                        | 76               | 61                       | 33.9          | 15 | 20.8        |                                                           |                      |          |
| 25 to <30                       | 29            | 16                    | 29.6         | 13 | 30.2        |                                                        | 76               | 48                       | 26.7          | 28 | 38.9        |                                                           |                      |          |
| >=30                            | 33            | 19                    | 35.2         | 14 | 32.6        |                                                        | 74               | 48                       | 26.7          | 26 | 36.1        |                                                           |                      |          |
| Missing                         | 13            | 8                     | 14.8         | 5  | 11.6        |                                                        | 26               | 23                       | 12.8          | 3  | 4.2         |                                                           |                      |          |
| Hormone therapy use at baseline |               |                       |              |    |             | 0.20                                                   |                  |                          |               |    |             | 0.47                                                      | 0.28                 |          |
| Non-user                        | 47            | 22                    | 40.7         | 25 | 58.1        |                                                        | 104              | 70                       | 38.9          | 34 | 47.2        |                                                           |                      |          |
| Current user                    | 33            | 22                    | 40.7         | 11 | 25.6        |                                                        | 111              | 82                       | 45.6          | 29 | 40.3        |                                                           |                      |          |

|                                 |            |    |            |    |            |                   |            |     |            |    |            |                   |                    |
|---------------------------------|------------|----|------------|----|------------|-------------------|------------|-----|------------|----|------------|-------------------|--------------------|
| Former user                     | 17         | 10 | 18.5       | 7  | 16.3       |                   | 37         | 28  | 15.6       | 9  | 12.5       |                   |                    |
| SEER summary stage at diagnosis |            |    |            |    |            | 0.94              |            |     |            |    |            | 0.16              | 0.32               |
| Localized                       | 41         | 23 | 42.6       | 18 | 41.9       |                   | 112        | 75  | 41.7       | 37 | 51.4       |                   |                    |
| Regional/distant/unknown        | 56         | 31 | 57.4       | 25 | 58.1       |                   | 140        | 105 | 58.3       | 35 | 48.6       |                   |                    |
| Year of Diagnosis               |            |    |            |    |            | 0.16              |            |     |            |    |            | 0.64              | 0.57               |
| 1990-1996                       | 40         | 23 | 42.6       | 17 | 39.5       |                   | 101        | 70  | 38.9       | 31 | 43.1       |                   |                    |
| 1997-2000                       | 34         | 22 | 40.7       | 12 | 27.9       |                   | 81         | 57  | 31.7       | 24 | 33.3       |                   |                    |
| 2001-2008                       | 23         | 9  | 16.7       | 14 | 32.6       |                   | 70         | 53  | 29.4       | 17 | 23.6       |                   |                    |
| Progesterone Receptor           |            |    |            |    |            | 0.37              |            |     |            |    |            | 0.73              | 0.30               |
| Negative                        | 27         | 17 | 31.5       | 10 | 23.3       |                   | 42         | 31  | 17.2       | 11 | 15.3       |                   |                    |
| Positive                        | 70         | 37 | 68.5       | 33 | 76.7       |                   | 208        | 148 | 82.2       | 60 | 83.3       |                   |                    |
| Missing                         | 0          | 0  | 0.0        | 0  | 0.0        |                   | 2          | 1   | 0.6        | 1  | 1.4        |                   |                    |
| Tumor Size (mm)                 |            |    |            |    |            | 0.59              |            |     |            |    |            | 0.62              | 0.02               |
| ≤ 2                             | 45         | 26 | 48.1       | 19 | 44.2       |                   | 164        | 115 | 63.9       | 49 | 68.1       |                   |                    |
| > 2                             | 46         | 24 | 44.4       | 22 | 51.2       |                   | 82         | 60  | 33.3       | 22 | 30.6       |                   |                    |
| Missing                         | 6          | 4  | 7.4        | 2  | 4.7        |                   | 6          | 5   | 2.8        | 1  | 1.4        |                   |                    |
| Tumor differentiation           |            |    |            |    |            | 0.65*             |            |     |            |    |            | 0.28              | <0.01*             |
| Well differentiated             | 1          | 1  | 1.9        | 0  | 0.0        |                   | 67         | 43  | 23.9       | 24 | 33.3       |                   |                    |
| Moderately differentiated       | 55         | 32 | 59.3       | 23 | 53.5       |                   | 121        | 91  | 50.6       | 30 | 41.7       |                   |                    |
| Poorly differentiated           | 34         | 17 | 31.5       | 17 | 39.5       |                   | 52         | 37  | 20.6       | 15 | 20.8       |                   |                    |
| Missing                         | 7          | 4  | 7.4        | 3  | 7.0        |                   | 12         | 9   | 5.0        | 3  | 4.2        |                   |                    |
| Duration of tamoxifen use, mo   |            |    |            |    |            | 0.47 <sup>#</sup> |            |     |            |    |            | 0.32 <sup>#</sup> | <0.01 <sup>#</sup> |
| Mean (Std Error)                | 40.9 (2.0) |    | 42.6 (2.8) |    | 38.9 (2.8) |                   | 52.9 (1.2) |     | 52.7 (1.4) |    | 53.4 (2.1) |                   |                    |
| Breast Cancer Death             |            |    |            |    |            | n/a               |            |     |            |    |            | n/a               | <0.01*             |
| No                              | 0          | 0  | 0.0        | 0  | 0.0        |                   | 252        | 180 | 100.0      | 72 | 100.0      |                   |                    |
| Yes                             | 97         | 54 | 100.0      | 43 | 100.0      |                   | 0          | 0   | 0.0        | 0  | 0.0        |                   |                    |

\$ Chi-Squared analysis \* Fisher exact test *P* values were computed excluding missing categories.

<sup>#</sup>Wilcoxon rank sum test *P*-values <0.05 are highlighted in bold font.

**Supplementary Table 2.** Relationships between TDLU measurements (TDLU counts, TDLU span and acini counts/TDLU).

|                                      | TDLU count/100 mm <sup>2</sup> |                | TDLU span <sup>&amp;</sup> (microns) |                |
|--------------------------------------|--------------------------------|----------------|--------------------------------------|----------------|
|                                      | r                              | <i>P</i> value | r                                    | <i>P</i> value |
| TDLU count/100 mm <sup>2</sup>       | 1.00                           | -              | -                                    | -              |
| TDLU span <sup>&amp;</sup> (microns) | 0.52                           | <0.0001        | 1.00                                 | -              |
| Acini count/TDLU <sup>&amp;</sup>    | 0.48                           | <0.0001        | 0.90                                 | <0.0001        |

TDLU: terminal duct lobular unit & Among patients with TDLUs observed *P*-values were estimated using Spearman's rank correlation coefficients. *P*-values <0.05 highlighted in bold font.

**Supplementary Table 3:** Relationships between MD-decline and breast cancer-specific death stratified by median baseline TDLUs measurements.

|                                | <b><u>Low (&lt; median)</u></b> |                |                                   | <b><u>High (≥ median)</u></b> |                |                                   |
|--------------------------------|---------------------------------|----------------|-----------------------------------|-------------------------------|----------------|-----------------------------------|
|                                | <b>Case</b>                     | <b>Control</b> | <b>Base model OR<br/>(95% CI)</b> | <b>Case</b>                   | <b>Control</b> | <b>Base model OR<br/>(95% CI)</b> |
| TDLU count/mm <sup>2</sup>     |                                 |                |                                   |                               |                |                                   |
| MD change <10%                 | 25                              | 69             | Ref.                              | 20                            | 50             | Ref.                              |
| MD change ≥10%                 | 4                               | 21             | 0.62 (0.18, 2.06)                 | 5                             | 40             | 0.27 (0.09, 0.83)                 |
| TDLU span <sup>1</sup>         |                                 |                |                                   |                               |                |                                   |
| MD change <10%                 | 28                              | 66             | Ref.                              | 13                            | 47             | Ref.                              |
| MD change ≥10%                 | 2                               | 20             | 0.22 (0.05, 1.06)                 | 5                             | 38             | 0.52 (0.16, 1.68)                 |
| TDLU acini counts <sup>1</sup> |                                 |                |                                   |                               |                |                                   |
| MD change <10%                 | 27                              | 66             | Ref.                              | 14                            | 46             | Ref.                              |
| MD change ≥10%                 | 2                               | 20             | 0.23 (0.05, 1.13)                 | 5                             | 38             | 0.43 (0.13, 1.40)                 |

OR = odds ratio, CI = confidence interval; Reference group for all analysis included women with breast density change <10%; Base model adjusted for age, stage, year of diagnosis, follow-up time (all as categorical variables); <sup>1</sup>among women with observed TDLUs. Median cut off for TDLU span (low/high) was 465 (median cut-off based on controls with TDLUs). Median cut off for TDLU counts (low/high) was 7.04 (median cut-off based on distribution including 0's). Median cut off for TDLU acini was 24 (analyzer acini assessment: median cut-off based on controls with TDLUs).
